# Supplementary material for: A multi-centre, parallel-group, randomised controlled trial to assess the efficacy and safety of eurythmy therapy and tai chi in comparison with standard care in chronically ill elderly patients with increased risk of falling (ENTAiER): a trial protocol
Source: Springer Nature journal article supplement (doi:10.1186/s12877-020-1503-6), 2020-03-17
Supplement: MOESM3 [file 17807706]

**Have you done any balance training in the last 6 months?**

- No  
 Yes
- Simple exercises at home (e.g. brushing teeth on one leg)  
 Tai Chi or Qi Gong (outside of the study)  
 Dancing  
 Exercise programme, as recommended in the brochure "Balance & Strength"  
 Other courses or special training offer  
 Physiotherapy
- 

**Have you done any strength training in the last 6 months?**

- No  
 Yes
- Simple exercises at home (e.g. with elastic exercise band)  
 Sports club or fitness center  
 Exercise programme, as recommended in the brochure "Balance & Strength"  
 Other courses or special training offer  
 Physiotherapy  
 Regular outdoor exercise (e.g. hiking)
- 

**In the last 6 months, have you paid more attention on calcium intake than before? (E.g. through milk, dairy products or in tablet form)**

- Yes     No     I don't know
- 

**In the last 6 months, have you paid more attention to your vitamin D supply than before? (Staying in the sun, food such as fish, eggs, as a dietary supplement)**

- Yes     No     I don't know

**Have you paid more attention to safe footwear in the last 6 months than before?**

- Yes     No     I don't know

**Have you made your living environment safer in the last 6 months? (e.g. better lighting, avoidance of tripping hazards or slippery surfaces, railings and handles)**

- Yes     No     I don't know

**Have you visited Internet addresses from the brochure "Balance & Strength" to get ideas for fall prevention?**

- Yes, many     Only some     No     I don't know

**What was helpful for your motivation for the training?**

- Suggestions through the brochure „Balance & Strength“
- Motivation by study personnel / training group leaders
- A personal goal that I want to achieve through the exercises
- The documentation in the training diary
- I train so as not to fall
- Exercise manual or DVD from the ENTAIER study
- Exchange with other study participants
- Others \_\_\_\_\_

**Have you attended Tai Chi classes in the last 6 months (outside the study)?**

- Yes     No

**Have you attended eurythmy courses or eurythmy therapy in the last 6 months (outside the study)?**

- Yes     No
