# Supplementary material for: A multi-centre, parallel-group, randomised controlled trial to assess the efficacy and safety of eurythmy therapy and tai chi in comparison with standard care in chronically ill elderly patients with increased risk of falling (ENTAiER): a trial protocol
Source: Springer Nature journal article supplement (doi:10.1186/s12877-020-1503-6), 2020-03-17
Supplement: MOESM4 [file 17807706]

**Haben Sie in den letzten 6 Monaten ein Balancetraining durchgeführt?**

- Nein  
 Ja
- Einfache Übungen zu Hause (z.B. Zähneputzen auf einem Bein)  
 Tai Chi oder Qi Gong (außerhalb der Studie)  
 Tanzen  
 Übungsprogramm, wie in der Broschüre „Gleichgewicht & Kraft“ empfohlen  
 Andere Kurse oder spezielles Trainingsangebot  
 Krankengymnastik
- 

**Haben Sie in den letzten 6 Monaten ein Krafttraining durchgeführt?**

- Nein  
 Ja
- einfache Übungen zu Hause (z.B. mit Gymnastikband)  
 Sportverein oder Fitnesscenter  
 Übungsprogramm, wie in der Broschüre „Gleichgewicht & Kraft“ empfohlen  
 andere Kurse oder spezielles Trainingsangebot  
 Krankengymnastik  
 regelmäßige Bewegung im Freien (z.B. Wandern)
- 

**Haben Sie in den letzten 6 Monaten mehr als früher auf die Einnahme von Kalzium geachtet?  
(z.B. durch Milch, Milchprodukte oder in Tablettenform)**

- Ja     Nein     Ich weiß nicht
- 

**Haben Sie in den letzten 6 Monaten mehr als früher auf die Versorgung mit Vitamin D geachtet?  
(Aufenthalt in der Sonne, Nahrungsmittel wie Fisch, Eier, als Nahrungsergänzung)**

- Ja     Nein     Ich weiß nicht

**Haben Sie in den letzten 6 Monaten mehr als früher auf sicheres Schuhwerk geachtet?**

- Ja     Nein     Ich weiß nicht
- 

**Haben Sie in den letzten 6 Monaten Ihr Wohnumfeld sicherer gestaltet? (z.B. bessere Beleuchtung, Vermeidung von Stolperfallen oder rutschigen Flächen, Geländer und Griffe)**

- Ja     Nein     Ich weiß nicht
- 

**Haben Sie Internet-Adressen aus der Broschüre „Gleichgewicht & Kraft“ besucht, um Ideen zur Sturzprophylaxe zu bekommen?**

- Ja viele     Nur einzelne     Nein     Ich weiß nicht
- 

**Was war für Ihre Motivation zum Training hilfreich?**

- Anregung durch die Broschüre Gleichgewicht&Kraft
- Motivierung durch Studienpersonal / Übungsgruppenleiter
- Ein persönliches Ziel, das ich durch die Übungen erreichen möchte
- Die Dokumentation im Übungstagebuch
- Ich übe, um nicht zu stürzen
- Übungsmanual oder DVD aus der ENTAIER Studie
- Austausch mit anderen Studienteilnehmern
- Sonstiges \_\_\_\_\_
- 

**Haben Sie in den letzten 6 Monaten (außerhalb der Studie) Tai Chi Kurse besucht?**

- Ja     Nein

**Haben Sie in den letzten 6 Monaten (außerhalb der Studie) Eurythmie Kurse oder Eurythmie-Therapie besucht?**

- Ja     Nein
